# Supplementary material for: Impaired Height Growth Associated with Vitamin D Deficiency in Young Children from the Japan Environment and Children’s Study
Source: MDPI journal article supplement (doi:10.3390/nu14163325), 2022-08-13
Supplement: s1 [file s1]

**Table S1: Profile of the Sub-cohort study**

|                          | <b>Sub-Cohort study (n=3624)</b> |         |                  |
|--------------------------|----------------------------------|---------|------------------|
|                          |                                  | (SD)    | (95% CI)         |
| Sex                      |                                  |         |                  |
| Male (%)                 | 1828 (50.4)                      |         |                  |
| Female (%)               | 1796 (49.6)                      |         |                  |
| Birth information        |                                  |         |                  |
| pregnancy period [weeks] | 39.53                            | (1.12)  | (39.50, 39.57)   |
| birth weight [g]         | 3079.3                           | (378.2) | (3067.0, 3091.7) |
| birth height [cm]        | 49.17                            | (1.96)  | (49.11, 49.23)   |
| At 2 years of age        |                                  |         |                  |
| height [cm]              | 83.94                            | (2.93)  | (83.85, 84.04)   |
| height SDS               | -0.32                            | (0.98)  | (-0.36, -0.29)   |
| weight [kg]              | 11.52                            | (2.08)  | (11.46, 11.59)   |
| weight SDS               | 0.12                             | (0.98)  | (0.09, 0.15)     |
| BMI                      | 16.33                            | (2.70)  | (16.24, 16.41)   |
| BMI SDS                  | 0.49                             | (1.00)  | (0.46, 0.52)     |
| At 4 years of age        |                                  |         |                  |
| height [cm]              | 99.86                            | (3.74)  | (99.74, 99.98)   |
| height SDS               | -0.03                            | (0.97)  | (-0.06, 0.00)    |
| weight [kg]              | 15.5                             | (1.77)  | (15.45, 15.56)   |
| weight SDS               | 0.01                             | (0.88)  | (-0.02, 0.04)    |
| BMI                      | 15.52                            | (1.14)  | (15.48, 15.55)   |
| BMI SDS                  | 0.11                             | (0.84)  | (0.08, 0.13)     |

SD: standard deviation, 95% CI: 95% confidence interval, SDS: standard deviation score, BMI: body mass index
