# Supplementary material for: Impaired Height Growth Associated with Vitamin D Deficiency in Young Children from the Japan Environment and Children’s Study
Source: MDPI journal article supplement (doi:10.3390/nu14163325), 2022-08-13
Supplement: s1 [file s1]

**Table S2: Sun exposure habit of each subgroup by serum 25(OH)D3 concentrations**

|                                         | Subgroup by serum 25(OH)D3 concentrations |        |            |        |            |        |            |        |            |        |            |        |         |        |
|-----------------------------------------|-------------------------------------------|--------|------------|--------|------------|--------|------------|--------|------------|--------|------------|--------|---------|--------|
| 25(OH)D3 [ng/ml]                        | <10                                       |        | ≥10 to <15 |        | ≥15 to <20 |        | ≥20 to <25 |        | ≥25 to <30 |        | ≥30 to <40 |        | ≥40     |        |
| ..                                      | (n=40)                                    |        | (n=254)    |        | (n=524)    |        | (n=913)    |        | (n=925)    |        | (n=846)    |        | (n=122) |        |
| Time spent playing outside in summer    |                                           | (%)    |            | (%)    |            | (%)    |            | (%)    |            | (%)    |            | (%)    |         | (%)    |
| rare                                    | 0                                         | (0.0)  | 5          | (2.2)  | 13         | (2.6)  | 14         | (1.7)  | 13         | (1.5)  | 7          | (0.9)  | 1       | (0.9)  |
| less than 1 hour                        | 10                                        | (29.4) | 39         | (16.8) | 90         | (18.1) | 143        | (16.9) | 182        | (20.8) | 147        | (18.5) | 24      | (20.9) |
| 1 hour or more and less than 3 hours    | 23                                        | (67.6) | 170        | (73.3) | 359        | (72.2) | 604        | (71.6) | 588        | (67.0) | 561        | (70.7) | 77      | (67.0) |
| 3 hours or more                         | 1                                         | (2.9)  | 18         | (7.8)  | 35         | (7.0)  | 83         | (9.8)  | 94         | (10.7) | 79         | (9.9)  | 13      | (11.3) |
| unknown                                 | 6                                         |        | 22         |        | 27         |        | 69         |        | 48         |        | 52         |        | 7       |        |
| Time spent playing outside in winter    |                                           |        |            |        |            |        |            |        |            |        |            |        |         |        |
| rare                                    | 8                                         | (23.5) | 23         | (10.1) | 50         | (10.2) | 61         | (7.3)  | 63         | (7.3)  | 48         | (6.2)  | 3       | (2.8)  |
| less than 1 hour                        | 14                                        | (41.2) | 104        | (45.6) | 208        | (42.7) | 351        | (41.9) | 353        | (40.8) | 272        | (34.9) | 35      | (32.4) |
| 1 hour or more and less than 3 hours    | 12                                        | (35.3) | 100        | (43.9) | 212        | (43.5) | 396        | (47.3) | 405        | (46.8) | 424        | (54.4) | 63      | (58.3) |
| 3 hours or more                         | 0                                         | (0.0)  | 1          | (0.4)  | 17         | (3.5)  | 30         | (3.6)  | 45         | (5.2)  | 35         | (4.5)  | 7       | (6.5)  |
| unknown                                 | 6                                         |        | 26         |        | 37         |        | 75         |        | 59         |        | 67         |        | 14      |        |
| Frequently wear a hat outside in summer |                                           |        |            |        |            |        |            |        |            |        |            |        |         |        |
| yes                                     | 29                                        | (85.3) | 215        | (90.3) | 426        | (84.0) | 740        | (85.5) | 754        | (84.2) | 700        | (85.9) | 95      | (81.2) |
| no                                      | 5                                         | (14.7) | 23         | (9.7)  | 81         | (16.0) | 125        | (14.5) | 141        | (15.8) | 115        | (14.1) | 22      | (18.8) |
| unknown                                 | 6                                         |        | 16         |        | 17         |        | 48         |        | 30         |        | 31         |        | 5       |        |
| Frequently use a sunscreen in summer    |                                           |        |            |        |            |        |            |        |            |        |            |        |         |        |
| yes                                     | 10                                        | (29.4) | 75         | (31.5) | 142        | (28.0) | 238        | (27.5) | 226        | (25.3) | 253        | (31.0) | 29      | (24.8) |
| no                                      | 24                                        | (70.6) | 163        | (68.5) | 365        | (72.0) | 628        | (72.5) | 667        | (74.7) | 563        | (69.0) | 88      | (75.2) |
| unknown                                 | 6                                         |        | 16         |        | 17         |        | 47         |        | 32         |        | 30         |        | 5       |        |
